# Supplementary material
Source: Springer Nature journal article supplement (https://www.springermedizin.de/resource/supplementary/12978_2009_78_MOESM1_ESM.pdf/9602854)
Supplement: MOESM1 [file 9602854]

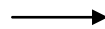

VIA/VILI negative - Home

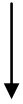

834 VIA/VILI positive (Referred for colposcopy)

209 Did not return for colposcopy

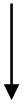

625 Returned (HIV positive = 103; HIV negative = 522)

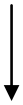

### Colposcopy evaluation.

## 454 Negative colposcopy - Home

→ 171 had positive colposcopy

————→ 9 invasive cervical cancer - to hospital for treatment

→ 128 inflammation, treated - antibiotics/antifungal for infection

→ 32 SIL (19-LGSIL, 13-HGSIL)

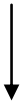

### Colposcopically directed biopsy

**Treatment** 31 had cryotherapy, 1 LEEP

**Follow-up** after 3 months by colposcopic evaluation:

- 27 were colposcopy negative
- 1 had inflammation, 1 persistent LGSIL, both HIV positive
- 3 did not return, all HIV negative
